# Supplementary material for: An Efficient High Throughput Metabotyping Platform for Screening of Biomass Willows
Source: MDPI journal article supplement (doi:10.3390/metabo4040946), 2014-10-28

**Figure S8.** Photographs of willow lines Resolution and Tora during their first year of growth.

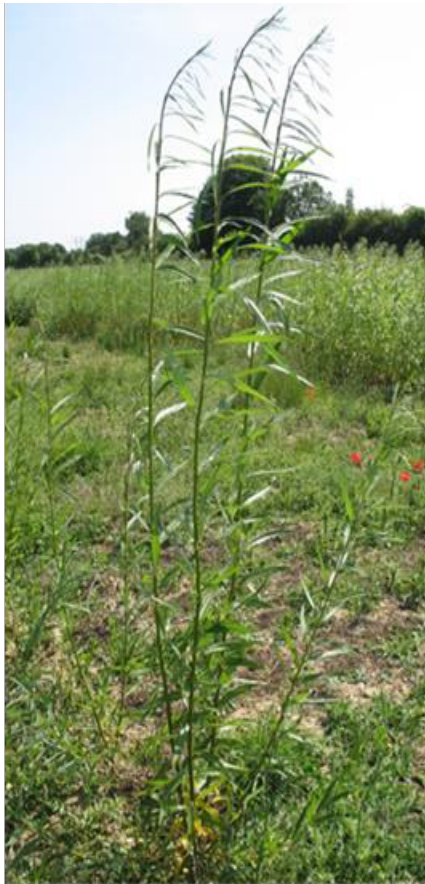

**Resolution**  
(Quest × SW930812)  
(*viminalis* × *schwerinii*)  
× *viminalis*)

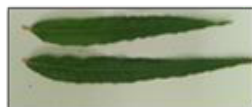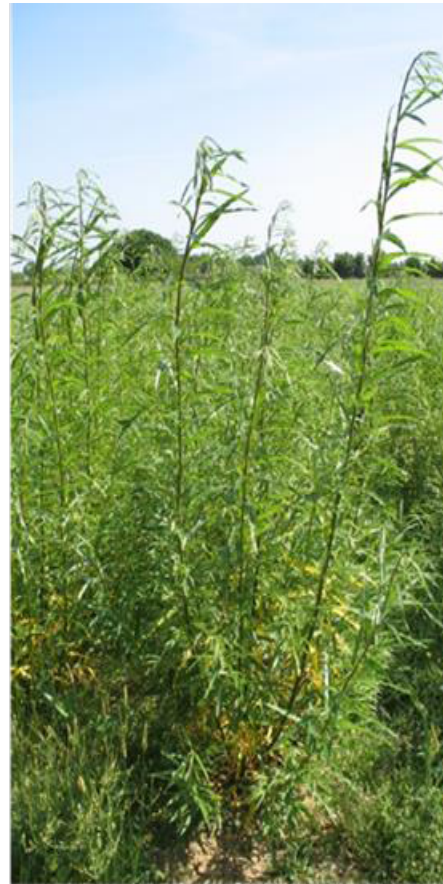

**Tora**  
(*schwerinii* ×  
*viminalis*)

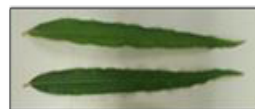

Supplement: s1 [file s1]
