# Supplementary material for: An Efficient High Throughput Metabotyping Platform for Screening of Biomass Willows
Source: MDPI journal article supplement (doi:10.3390/metabo4040946), 2014-10-28

**Figure S2.** PCA scores plots of concatenated positive and negative mode ESI-MS data, indicating clustering of Tora and Resolution leaf and stem samples. a: PC1 vs PC2 of leaf and stem data, coloured by harvest position; b: PC1 vs PC4 of leaf and stem data, coloured by genotype; c: PC1 vs PC5 of leaf and stem data, coloured by genotype; d: PC1 vs PC2 of leaf data only, coloured by genotype and harvest position; e: PC1 vs PC2 of stem data only, coloured by genotype and harvest position

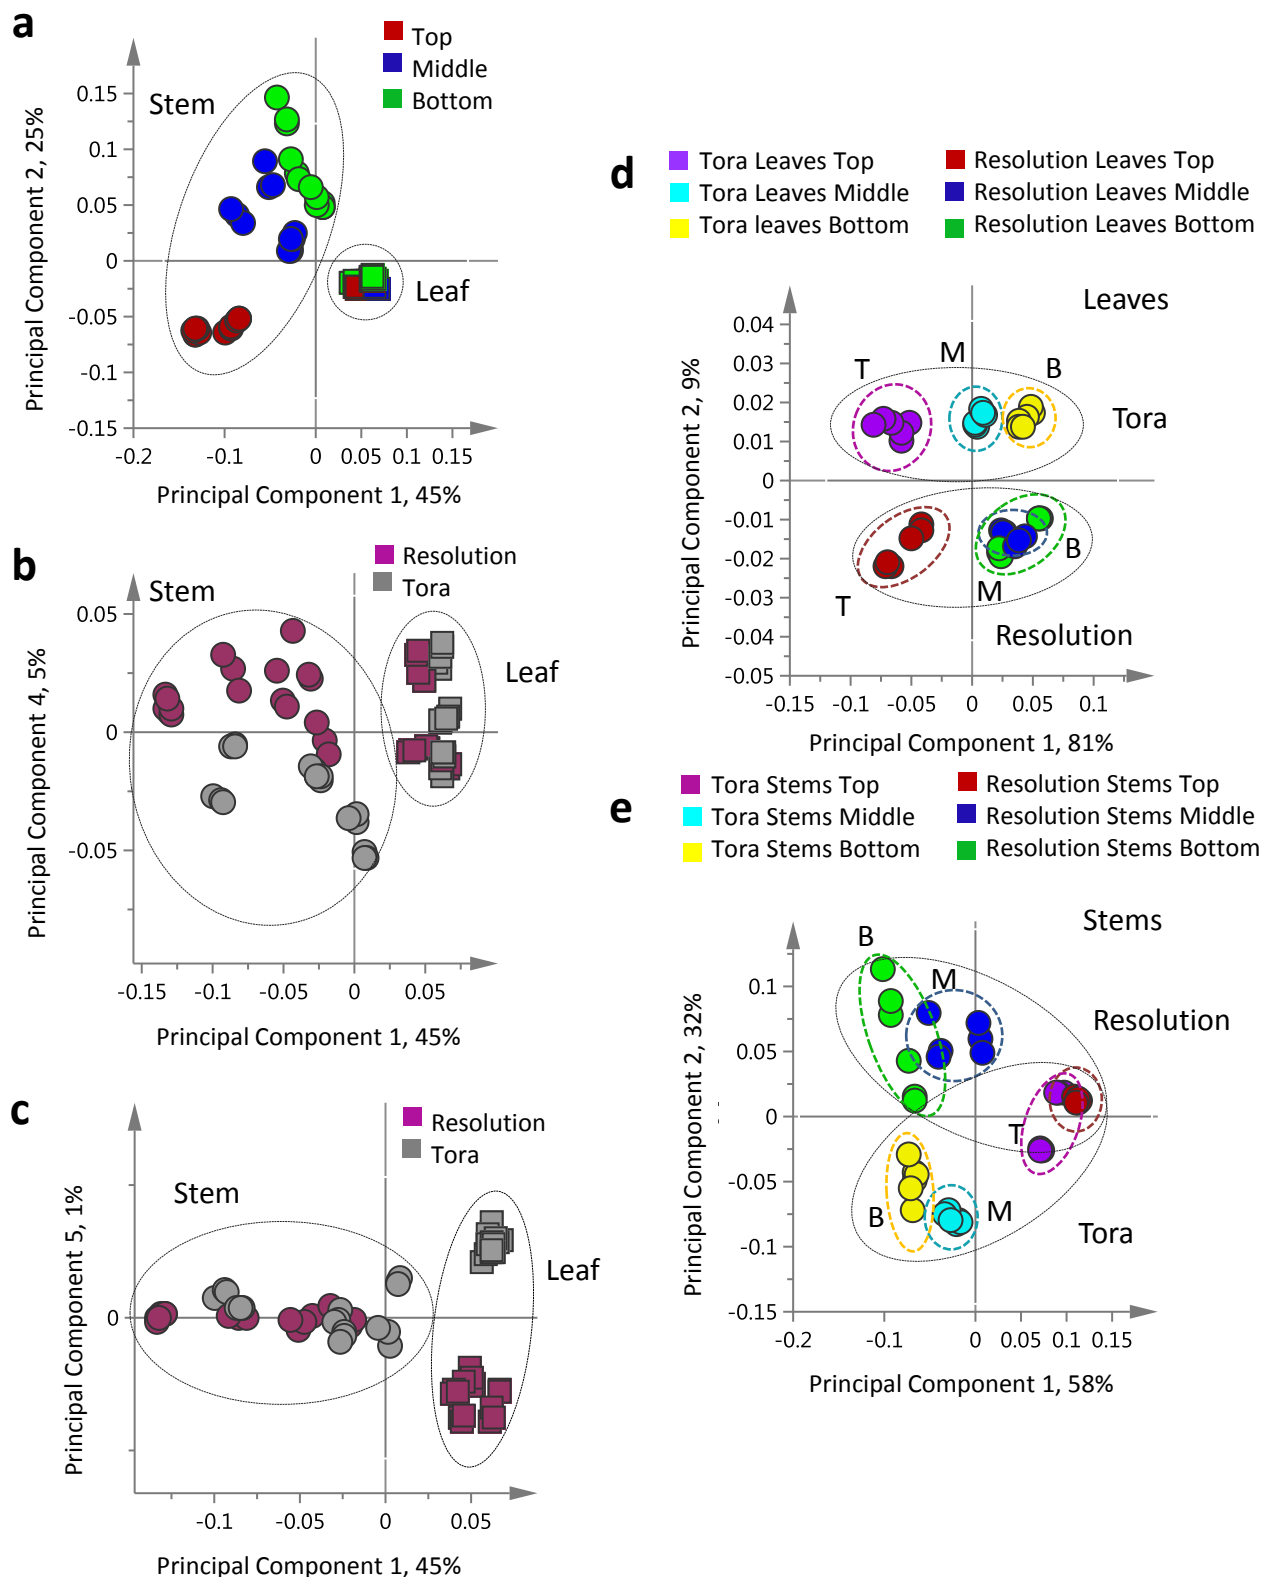

Supplement: s1 [file s1]
