# Supplementary material for: An Efficient High Throughput Metabotyping Platform for Screening of Biomass Willows
Source: MDPI journal article supplement (doi:10.3390/metabo4040946), 2014-10-28

Figure S5: Quantified data (via Chenomx) from 1D  $^1\text{H}$  NMR of willow stem tissue normalised to the extracted metabolite pool. Concentrations given in micrograms per mg of the extractable pool. Data points correspond to mean  $\pm$  standard deviation from two biological replicates. Red = Resolution; Blue = Tora. T = material harvested from the top of the plant. M = material harvested from the middle of the plant. B = material harvested from the bottom of the plant.

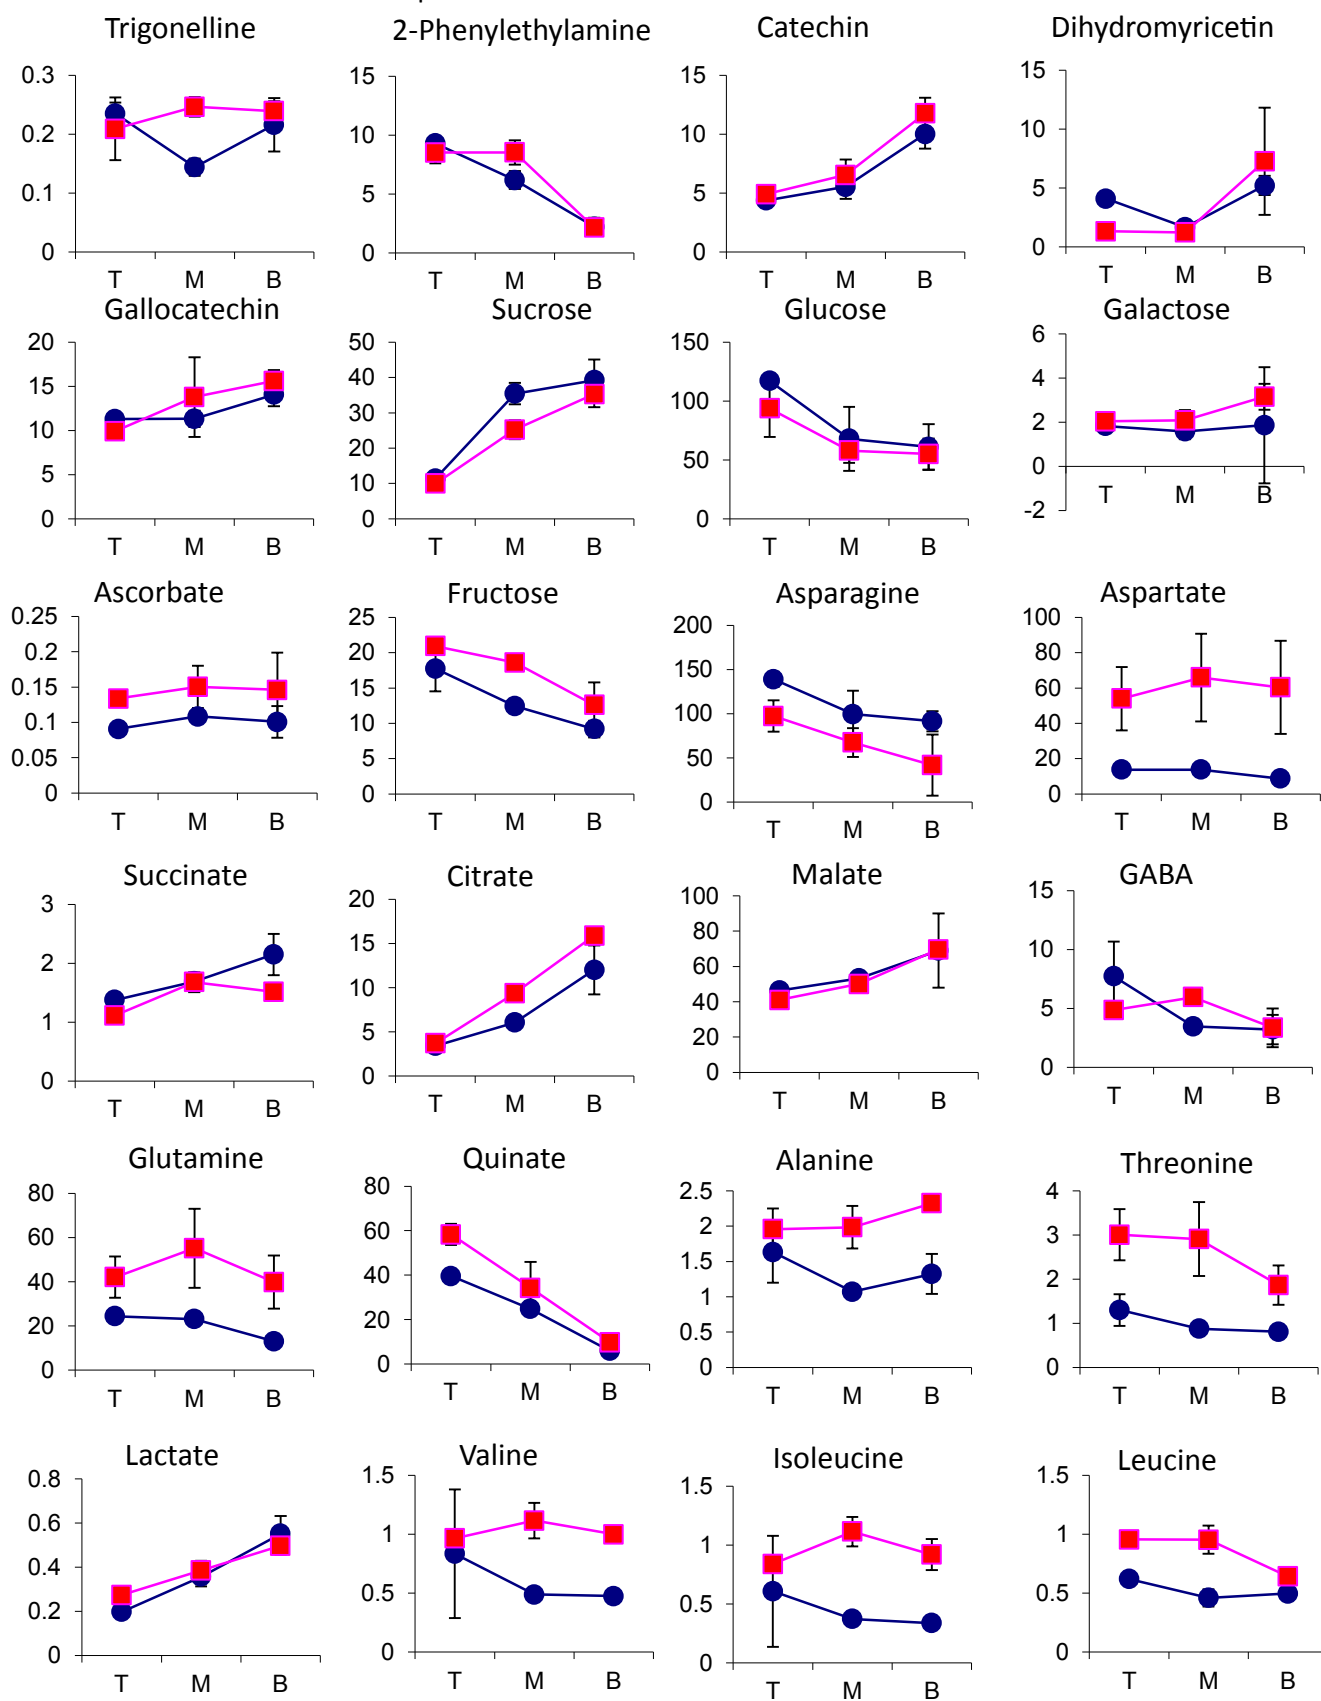

Supplement: s1 [file s1]
